# Supplementary figures and images for: Helicobacter pylori Urease: Potential Contributions to Alzheimer’s Disease
Source: MDPI journal article supplement (doi:10.3390/ijms23063091), 2022-03-13

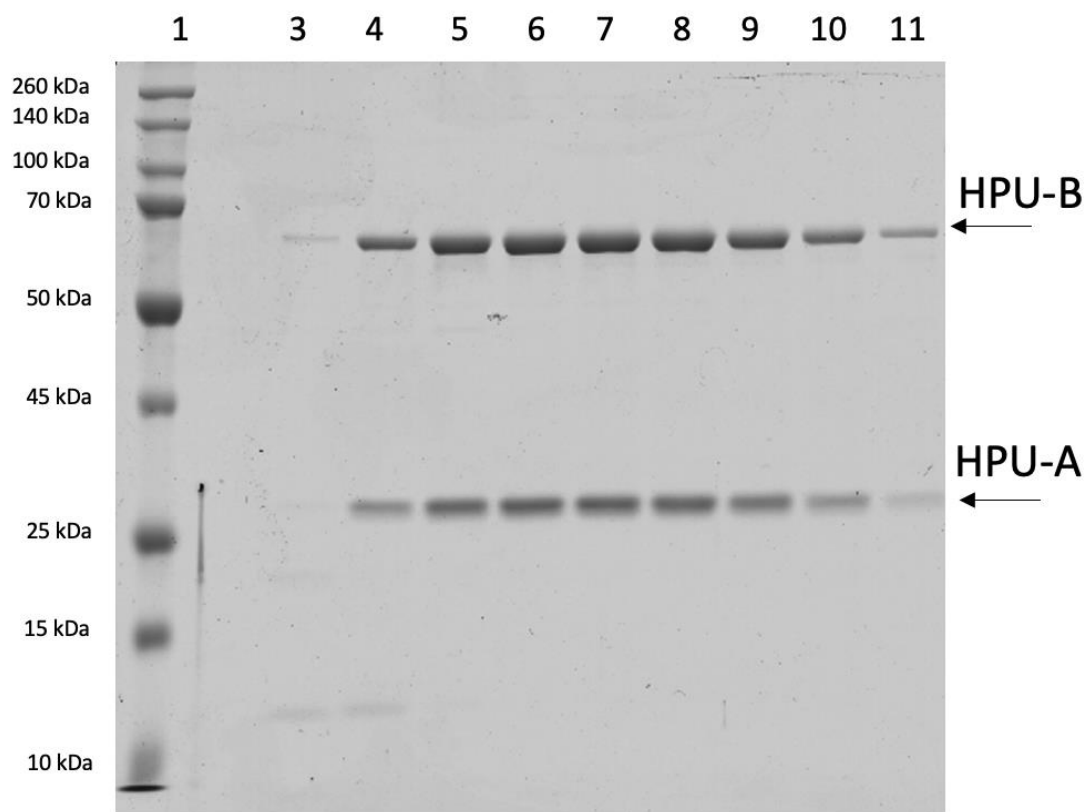

**Figure S1:** Purified recombinant *H. pylori* urease.

Supplement: s1 [file s1]
